# Supplementary material for: Risk for the release of an enormous amount of nanoplastics and microplastics from partially biodegradable polymer blends
Source: Royal Society of Chemistry journal article supplement (doi:10.1039/d2gc02388a), 2022-01-01
Supplement: d2gc02388a1.pdf [file d2gc02388a1.pdf]

## Supporting information

### **Risk for the release of an enormous amount of nanoplastics and microplastics from partially biodegradable polymer blends**

*Xin-Feng Wei,<sup>1,2\*</sup> Mikael S. Hedenqvist,<sup>1</sup> Luyao Zhao,<sup>1</sup> Andreas Barth,<sup>2</sup> Haiyan Yin,<sup>3\*</sup>*

1. Department of Fibre and Polymer Technology, KTH Royal Institute of Technology, SE-100 44 Stockholm, Sweden

2. Department of Biochemistry and Biophysics (DBB), Stockholm University, SE-106 91, Stockholm, Sweden

3. RISE Research Institutes of Sweden, Division Bioeconomy and Health, Material and Surface Design, Box 5607, SE-11486 Stockholm, Sweden

\*Corresponding authors: (xinfengbio@gmail.com (X. Wei), haiyan.yin@ri.se (H. Yin))

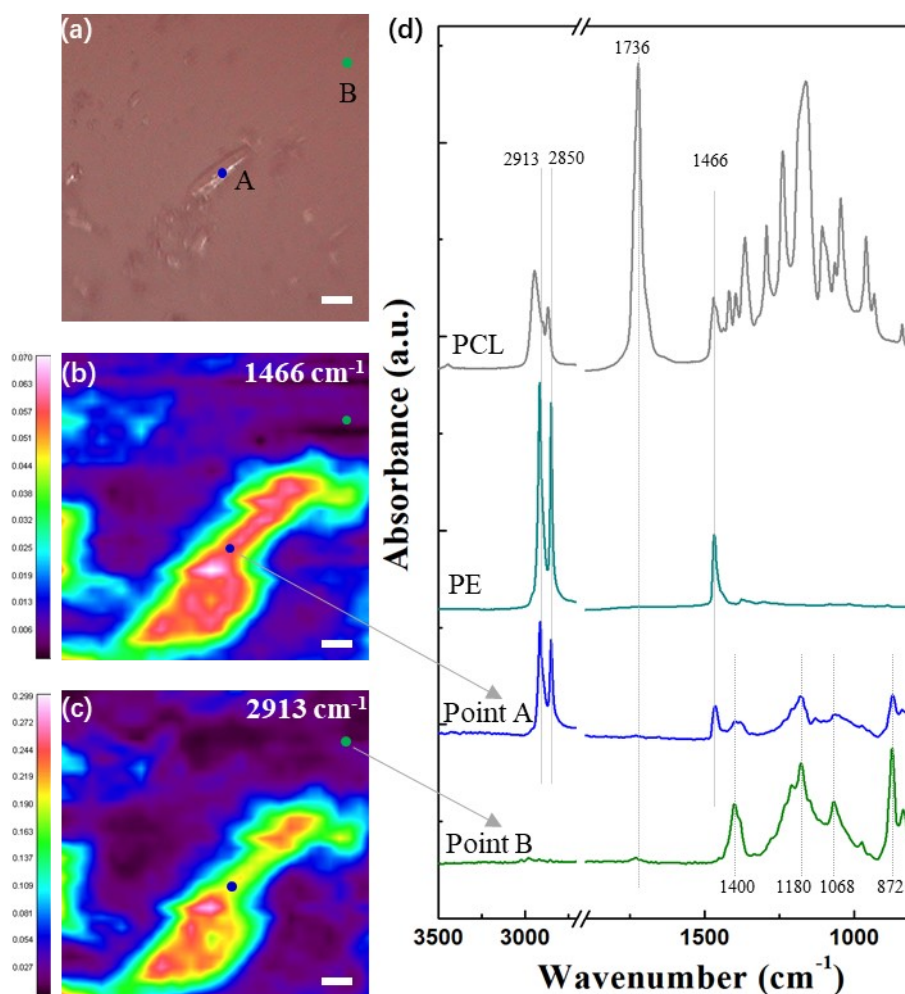

**Fig. S1.** IR microscope testing of the observed plastic particles on the polyvinylidene fluoride (PVDF) membrane. (a) image of the particles on the membrane; corresponding color image map of the absorption at 1466  $\text{cm}^{-1}$  (b) and 2913  $\text{cm}^{-1}$  (c), and (d) selected IR spectra from a microplastic location (point A) and from the membrane compared with the spectra of PE and PCL. The scale bars are 20  $\mu\text{m}$  long. The investigated sample consists of particles collected on the membrane after filtering 3 ml of the NMP suspension after 2 days of ageing. Using double-sided adhesive tape, the membrane sample was fixed on a metal microscopy slide, which was placed on the stage of the IR microscope. Image data were acquired with an attenuated total reflection (ATR) objective, a pixel size of 6.25  $\mu\text{m}$  at a resolution of 8  $\text{cm}^{-1}$ , eight consecutive scans, and a wavenumber range of 4000 to 800  $\text{cm}^{-1}$ . The area of the sample was imaged over 200  $\times$  200  $\mu\text{m}^2$ . The image maps and the IR spectra show that the observed particle in (a) shows the main IR bands of PE at 2913, 2850, and 1466  $\text{cm}^{-1}$ , but the dominating band of PCL at 1736  $\text{cm}^{-1}$  was not observed in the IR spectra of the particles. The presence of other additional peaks in the IR spectrum of point A is due to the membrane background. The results indicate that the observed plastic particles are made of PE rather than PCL.

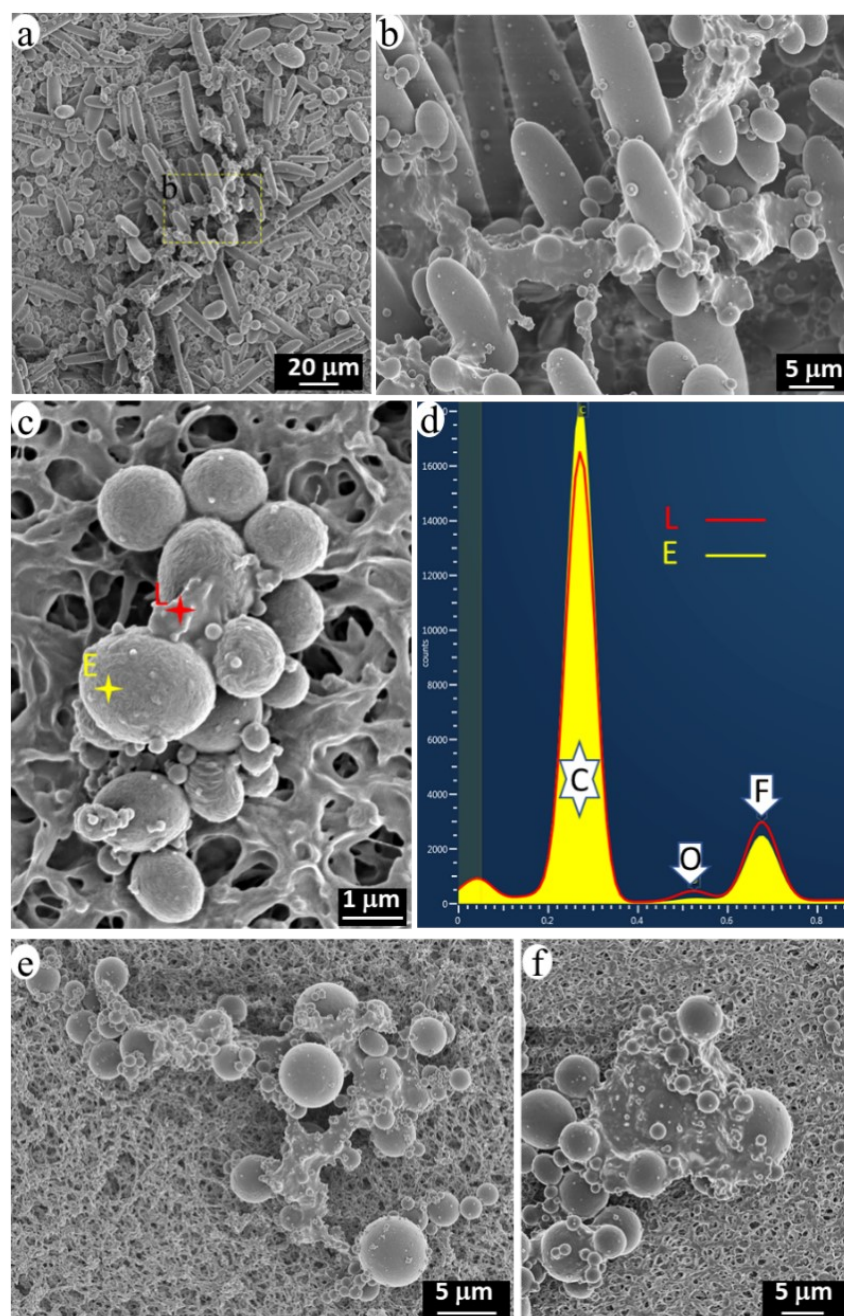

**Fig. S2.** SEM images in a and b show the blend fragments on the PVDF membrane for the PCL/PE sample after 2 days of ageing and after filtering 30 ml of the formed NMP suspension through one membrane. SEM images in c, e and f show the fragments on the membrane after filtering of 3 ml of the formed NMP suspension on one membrane for the samples after 2, 4, and 6 days of ageing, respectively. d shows the EDS results of the points on the PCL matrix (L) and PE particles (E). The EDS spectra show that the oxygen peak at point L is much greater than that at point E, confirming that the particles are PE while the connecting part is the PCL matrix as PCL consists of C, H and O, but PE only of C, H. The F peak in the EDS spectra is from the PVDF membrane background.

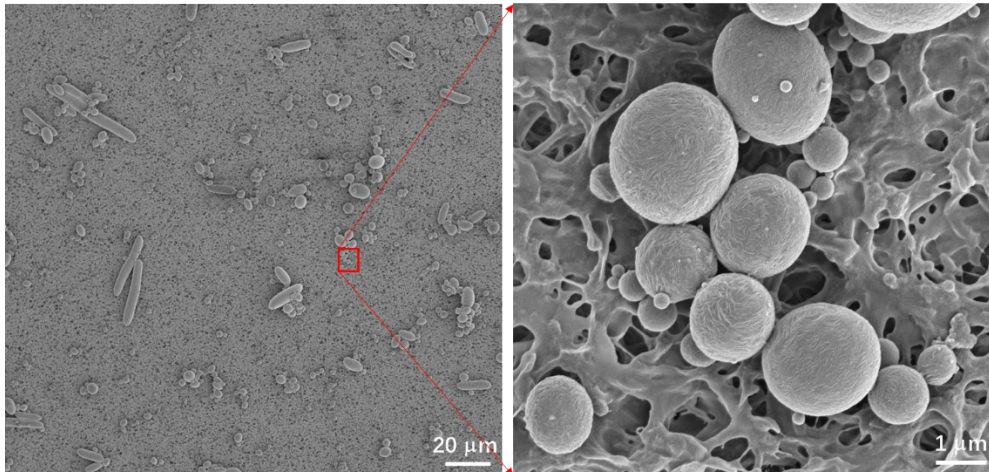

**Fig. S3.** SEM of the released particles on the PVDF membrane after filtering 3 ml of the formed NMP suspension through one membrane for the samples after 2 days of ageing. The enlarged graph shows that the particles aggregated together on the membrane, but without PCL matrix connection between them.

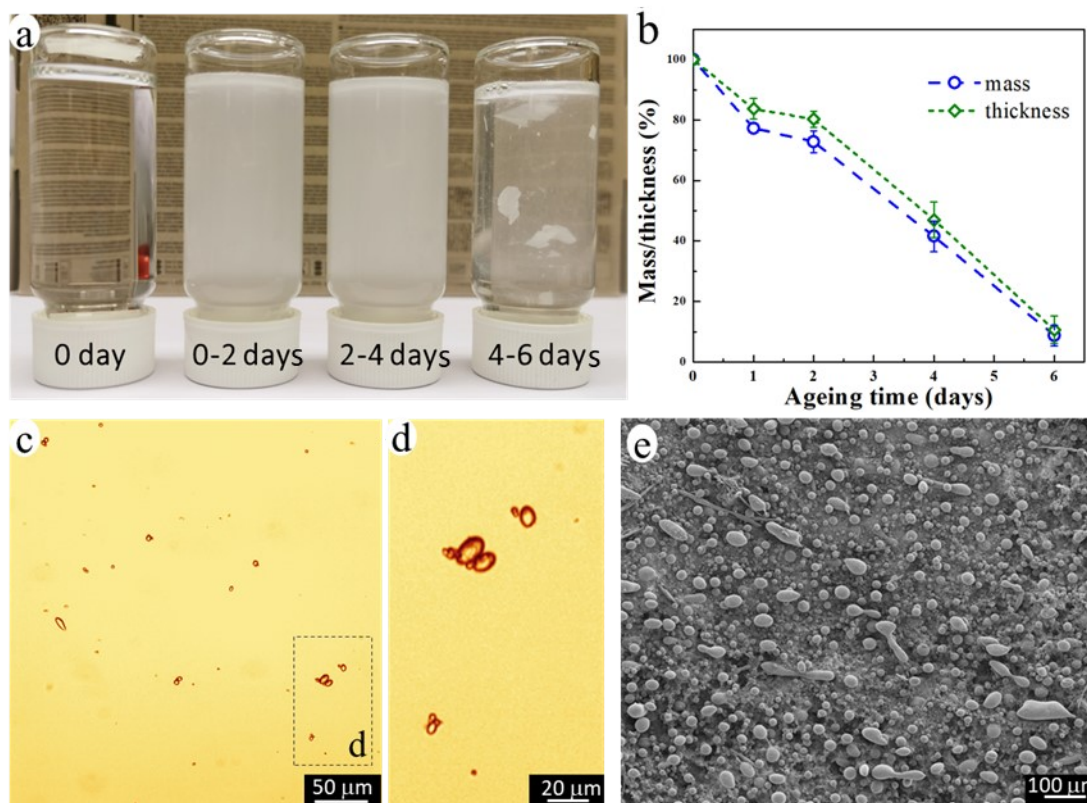

**Fig. S4.** NMPs formed during enzymatic hydrolysis of a PCL/PP blend with a mass ratio of 80/20: (a) image of the buffer solutions after different ageing periods (after shaking by hand); (b) the changes in mass and thickness of the film; (c-d) optical images of the formed particles for the sample with 4-6 days of ageing; and (e) SEM image of the surface of the blend film after 6 days of ageing.
